# Supplementary material for: Oxidative Stability and Antioxidant Activity in Canned Eels: Effect of Processing and Filling Medium
Source: PubMed Central journal article supplement (PMC8067596; doi:10.3390/foods10040790), 2021-04-07
Supplement: foods-10-00790-s001.pdf [file foods-10-00790-s001.pdf]

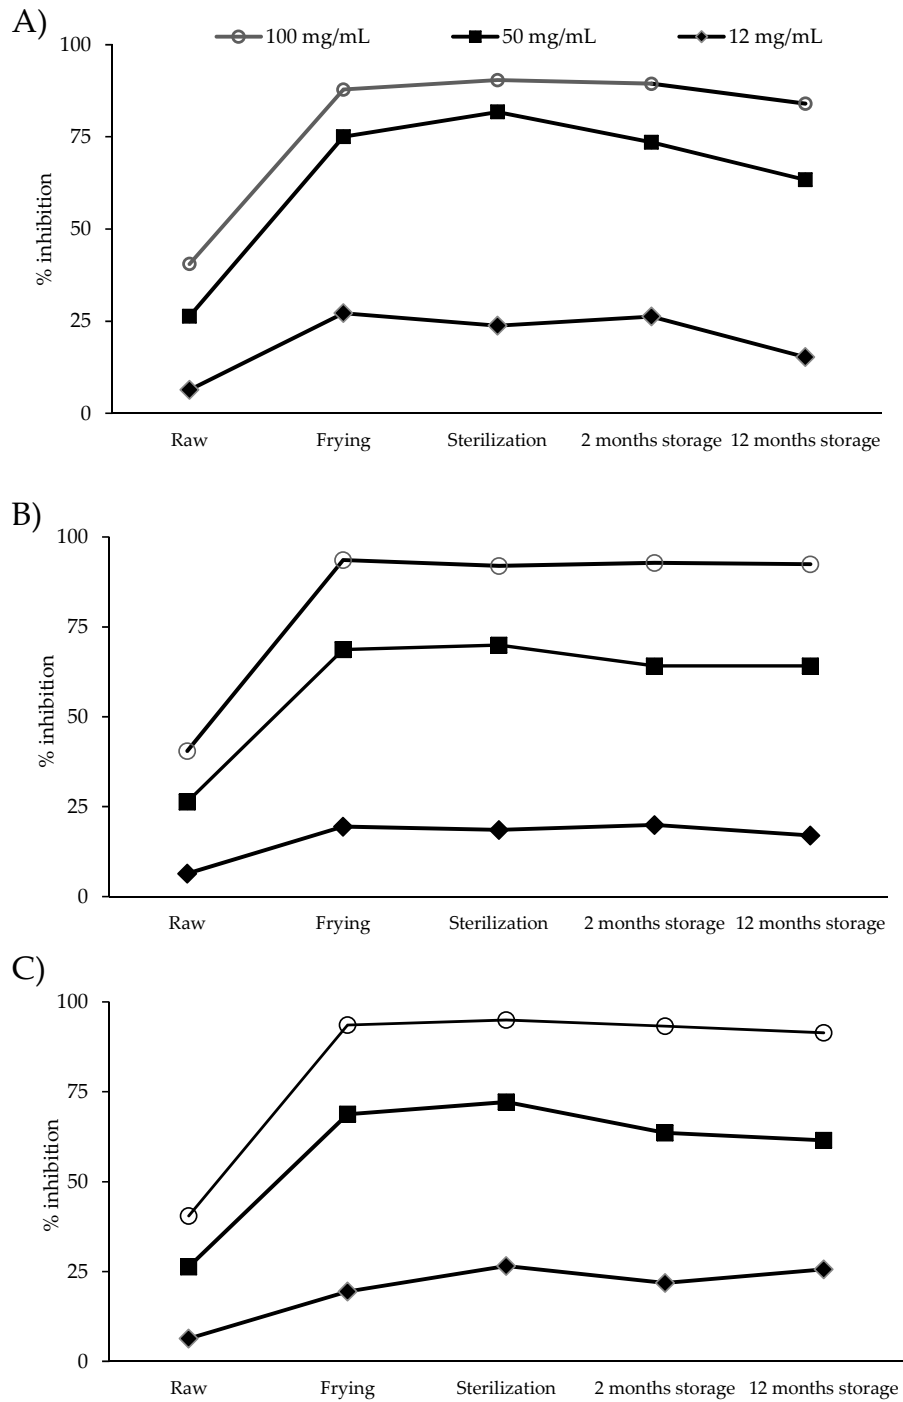

**Figure S1.** DPPH radical scavenging activity of different extracts (100, 50 and 12 mg/mL) of muscle eels packed in sunflower (A), olive (B) and spiced olive (C) oils after each stage of processing and storage.

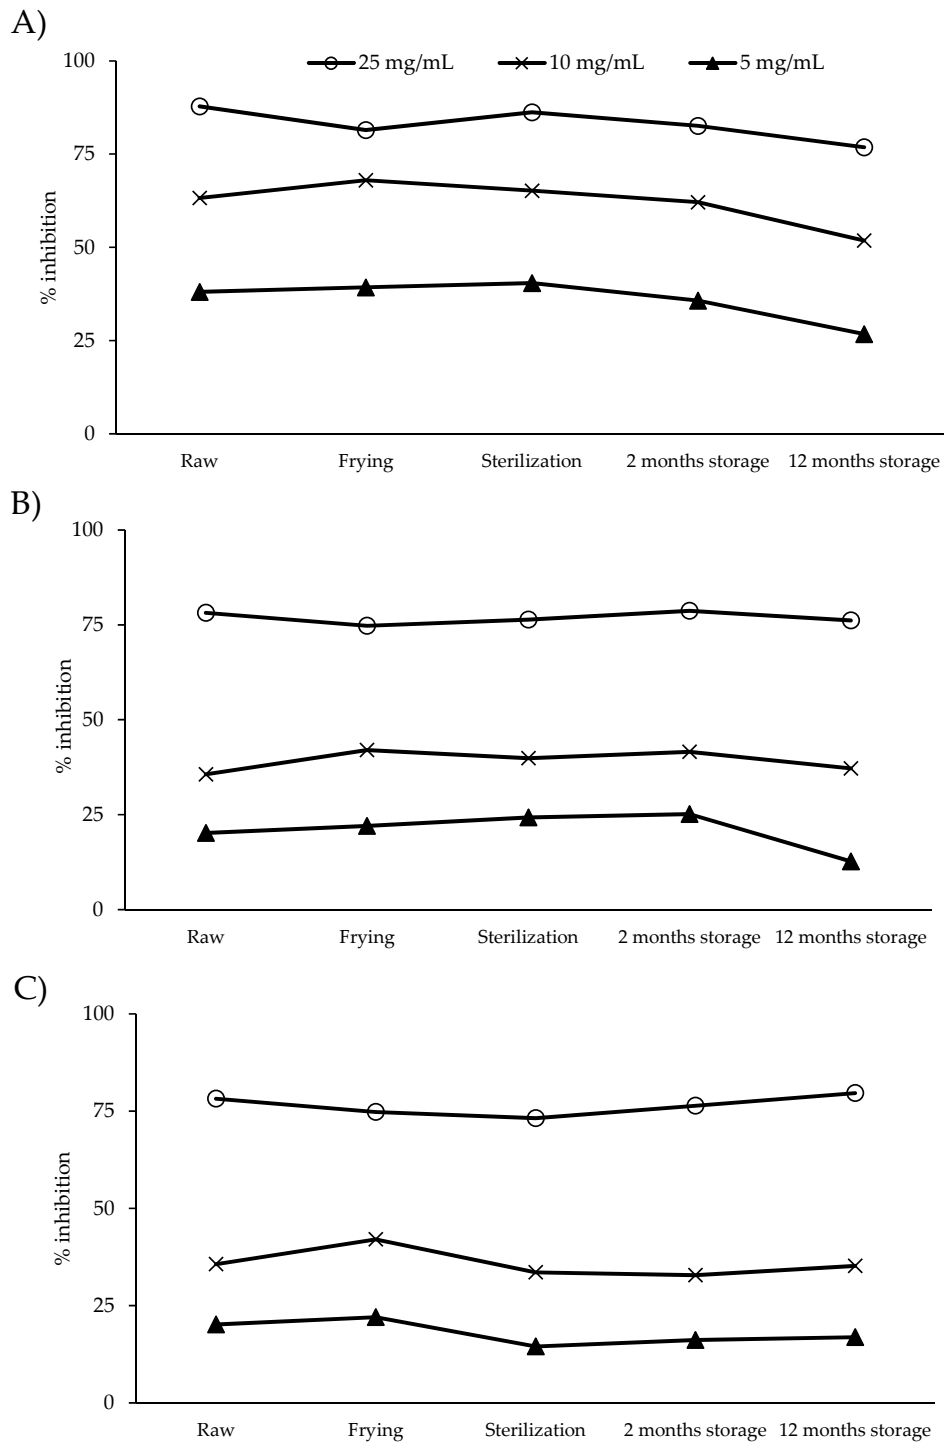

**Figure S2.** DPPH radical scavenging activity of different extracts (25, 10 and 5 mg/mL) of the filling media after each stage of canning process and subsequent storage. (A) sunflower oil; (B) olive oil; (C) spiced olive oil.
